# Supplementary material
Source: publisher site journal article supplement (https://www.dovepress.com/get_supplementary_file.php?f=496045.docx)
Supplement: Supplementary file 1 [file get_supplementary_file.php]

**Supplementary Materials**

**Table S1.** Tests of between-subjects effects in analysis of the serum uric acid levels

| Dependent variable: Serum uric acid levels | | | | | |
| --- | --- | --- | --- | --- | --- |
| Source | Type III Sum of Squares | df | Mean square | F value | Sig. |
| Corrected Model | 16259514.819a | 11 | 1478137.711 | 230.504 | 0.000 |
| Intercept | 80757945.330 | 1 | 80757945.330 | 12593.559 | 0.000 |
| Group | 83028.743 | 5 | 16605.749 | 2.590 | 0.024 |
| Gender | 1495707.329 | 1 | 1495707.329 | 233.244 | 0.000 |
| Group * Gender | 280379.377 | 5 | 56075.875 | 8.745 | 0.000 |
| Error | 30023973.914 | 4682 | 6412.639 |  |  |
| Total | 673312263.000 | 4694 |  |  |  |
| Corrected total | 46283488.733 | 4693 |  |  |  |

df: degree of freedom. a R squared = 0.351 (Adjusted R squared = 0.350)

**Table S2.** Multicollinearity test of the relationship of independent variables (laboratory examination indices) and dependent variable (serum uric acid levels).

| **Coefficients a** | | | | | | | | |
| --- | --- | --- | --- | --- | --- | --- | --- | --- |
| Model | | Unstandardized Coefficients | | Standardized Coefficients | t | Sig. | Collinearity Statistics | |
| B | Std. Error | Beta | Tolerance | VIF |
| 1 | (Constant) | 227.063 | 15.095 |  | 15.043 | 0.000 |  |  |
| Age | -1.033 | 0.131 | -0.107 | -7.902 | 0.000 | 0.779 | 1.284 |
| BMI | 5.046 | 0.420 | 0.185 | 12.019 | 0.000 | 0.606 | 1.651 |
| SBP | 0.727 | 0.128 | 0.112 | 5.675 | 0.000 | 0.369 | 2.708 |
| DBP | 0.377 | 0.179 | 0.040 | 2.106 | 0.035 | 0.397 | 2.522 |
| LDLC | 19.562 | 6.213 | 0.169 | 3.149 | 0.002 | 0.050 | 19.962 |
| HDLC | -65.947 | 7.024 | -0.231 | -9.389 | 0.000 | 0.237 | 4.216 |
| TCHO | -5.500 | 6.166 | -0.052 | -0.892 | 0.372 | 0.042 | 23.854 |
| TG | 11.689 | 2.184 | 0.159 | 5.353 | 0.000 | 0.164 | 6.106 |
| ALT | 0.396 | 0.091 | 0.111 | 4.332 | 0.000 | 0.218 | 4.581 |
| AST | -0.203 | 0.152 | -0.033 | -1.335 | 0.182 | 0.237 | 4.220 |
| FBG | -5.918 | 0.879 | -0.086 | -6.733 | 0.000 | 0.880 | 1.136 |

a. Dependent variable: serum uric acid levels
